# Supplementary material for: Corresponding Mitochondrial DNA and Niche Divergence for Crested Newt Candidate Species
Source: PLoS One. 2012 Sep 28;7(9):e46671. doi: 10.1371/journal.pone.0046671 (PMC3460878; doi:10.1371/journal.pone.0046671)

**Figure S1.** The results of the ENFA analysis for each pairwise comparison of (candidate) species. The x-axis shows marginality and the y-axis specialization. Grey shading shows the density of the occurrences of each (candidate) species' by cell. The solid and dashes contour lines illustrate 100% and 50% of the available environment in the study area. The environmental background looks different for each pairwise comparison because it is based on randomly drawn pseudo-absence data. The correlation circles (right) show the contribution of the climatic variables to the two axes.

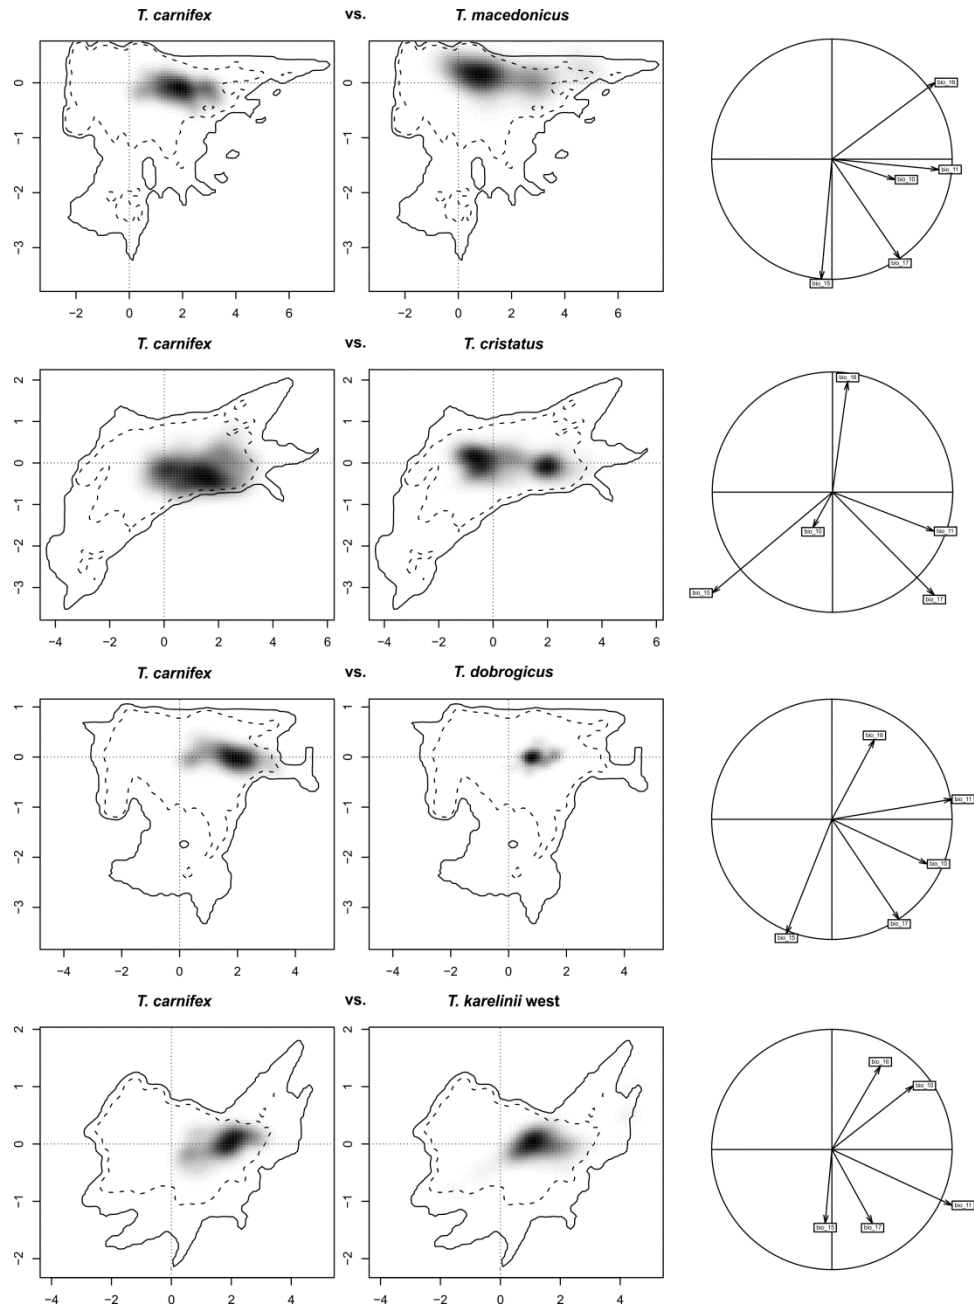

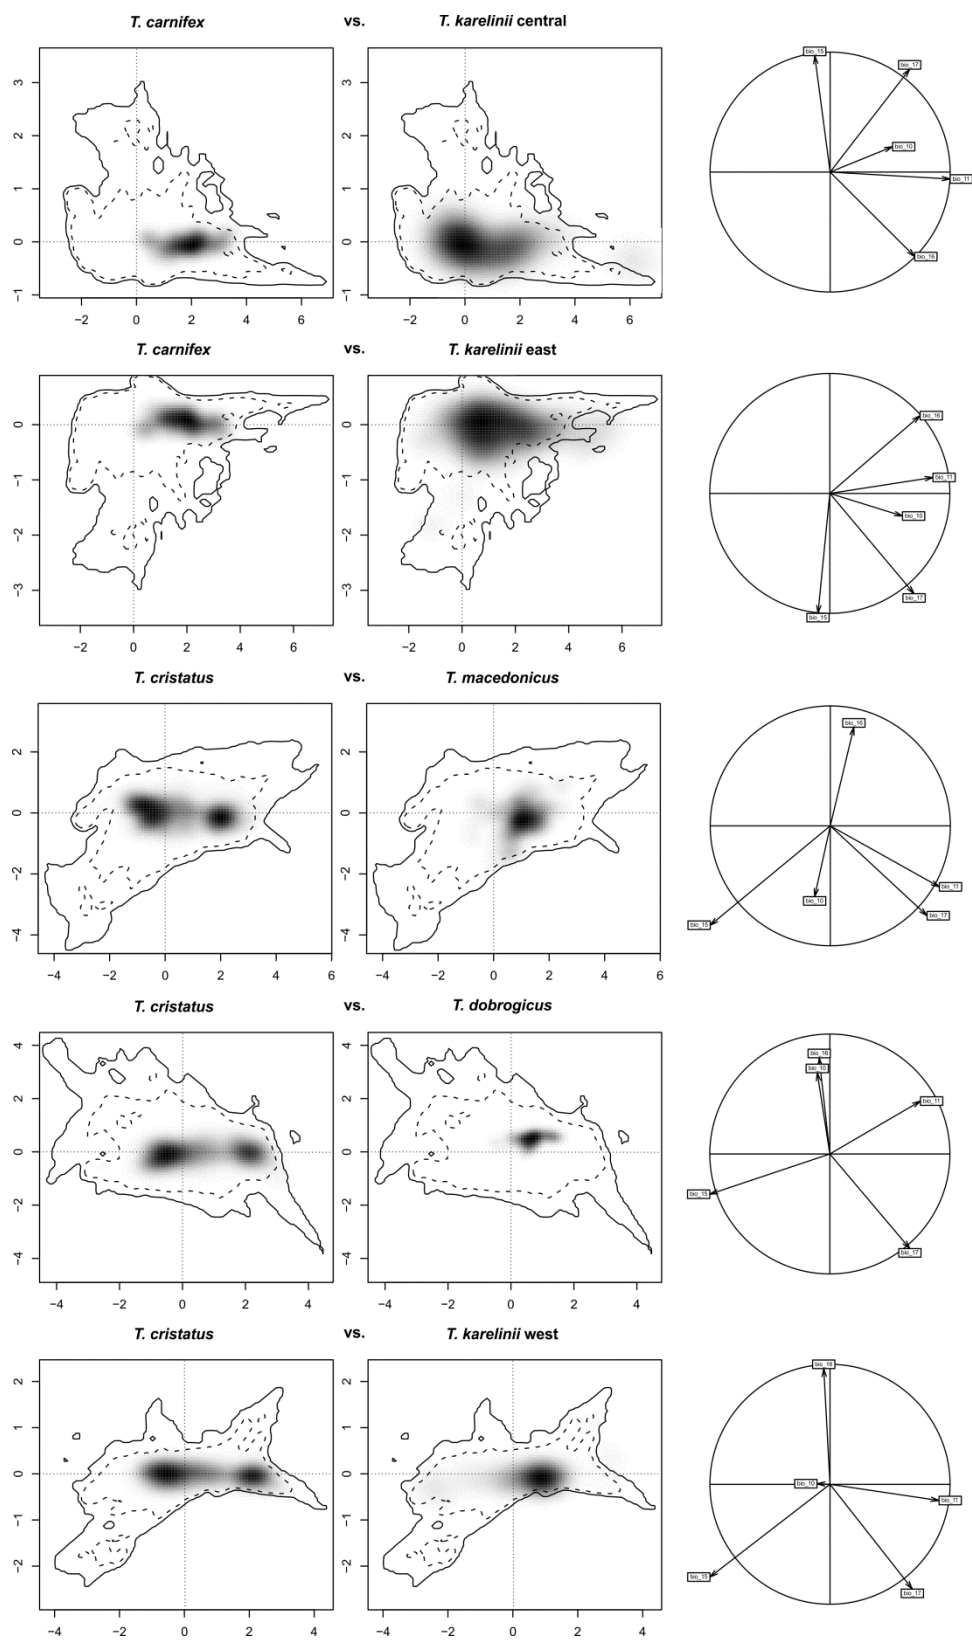

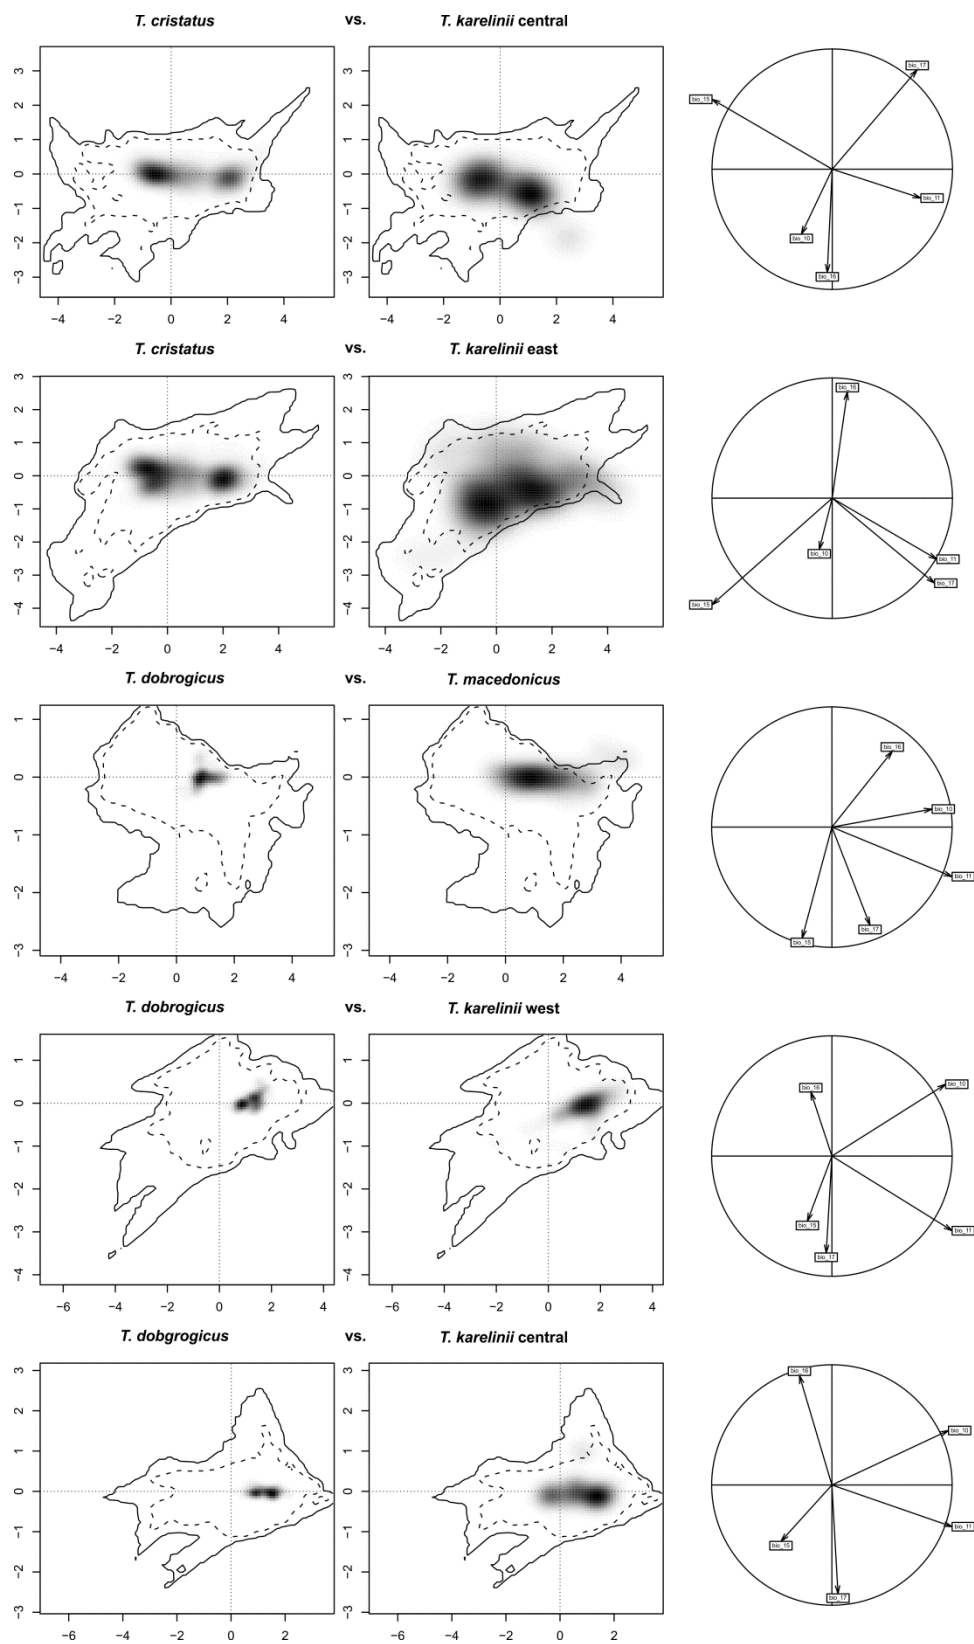

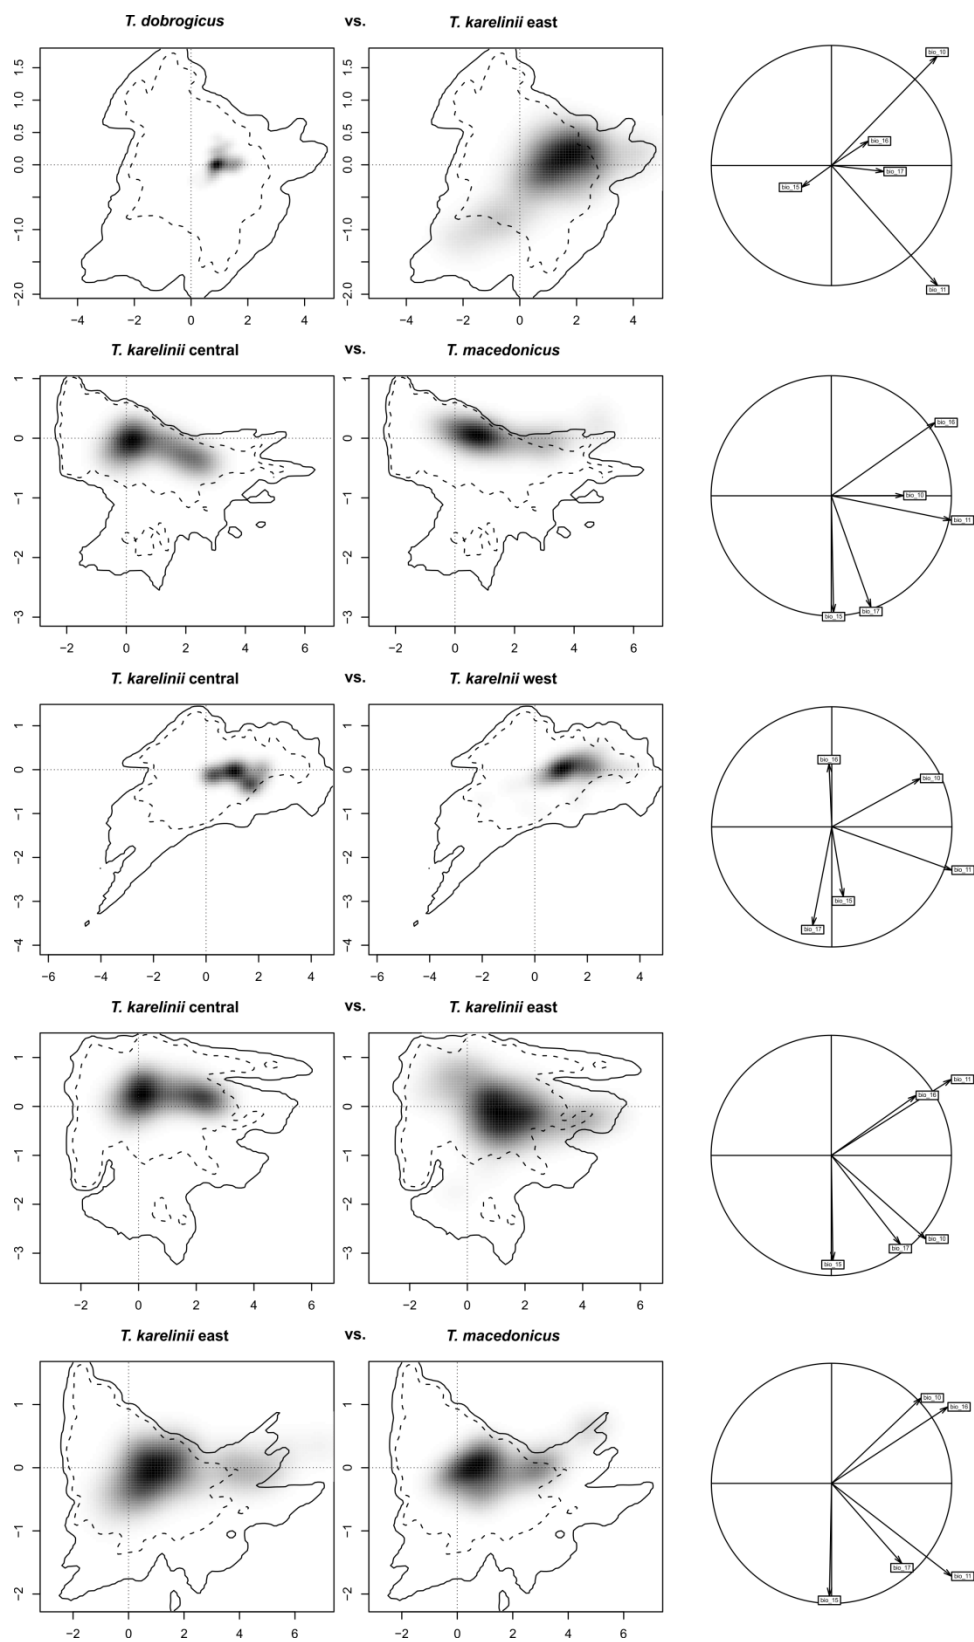

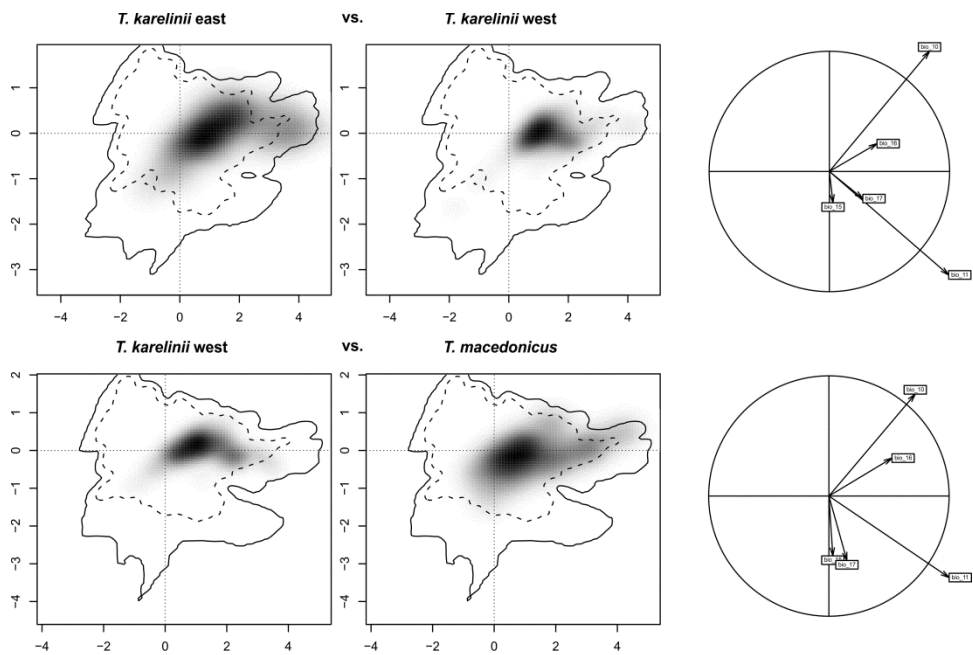

Supplement: Figure S1 — ENFA results for each pairwise comparison of (candidate) species. (PDF) [file pone.0046671.s002.pdf]
